# Supplementary material for: Defect engineering of a TiO2 anatase/rutile homojunction accelerating sulfur redox kinetics for high-performance Na–S batteries
Source: Royal Society of Chemistry journal article supplement (doi:10.1039/d4dt00745j), 2024-01-01
Supplement: d4dt00745j1.pdf [file d4dt00745j1.pdf]

## Supplementary Information

### Defect engineering of TiO<sub>2</sub> Anatase/Rutile homojunction accelerating the sulfur redox kinetics for High-Performance Na-S Batteries

Yue Xiao,<sup>a</sup> Yelei Zheng,<sup>a</sup> Ge Yao,<sup>\*a</sup> Yuhang Zhang,<sup>a</sup> Zhiqiang Li,<sup>a</sup> Shoujie Liu,<sup>\*a</sup> and Fangcai Zheng,<sup>\*ab</sup>

<sup>a</sup>Institutes of Physical Science and Information Technology  
School of Materials Science and Engineering  
Key Laboratory of Structure and Functional Regulation of Hybrid Materials  
Anhui University  
Hefei, Anhui 230601, China  
E-mail: zfc@mail.ustc.edu.cn (F.C. Zheng); jiesliu@ahnu.edu.cn (S.J. Liu);  
anne\_yao1995@163.com (G. Yao)

Prof. F. Zheng  
<sup>b</sup>High Magnetic Field Laboratory  
Hefei Institutes of Physical Science  
Chinese Academy of Sciences  
Hefei, Anhui, 230031, P. R. China  
E-mail: zfc@mail.ustc.edu.cn

**Keywords:** Carbon materials, Homojunction, Na-S Batteries, Catalytic conversion, Shuttle effect

## Experimental sections

### *Material synthesis*

*Chemicals:* 2-aminoterephthalic acid ( $C_8H_7NO_4$ ,  $\geq 98.0\%$ ), N, N-dimethylformamide (DMF,  $C_3H_7NO$ ,  $\geq 99.5\%$ ), tetrabutyl titanate ( $C_{16}H_{36}O_4Ti$ ,  $\geq 99.0\%$ ), methanol and ultrapure water were used. All chemicals were directly used in the experimental process without any purification.

*Synthesis of  $NH_2$ -MIL-125 (Ti):* 0.7 g of 2-aminoterephthalic acid was dissolved into a mixed solvent containing 10 mL of N, N-dimethylformamide (DMF) and 10 mL of methanol under stirring. Then, 0.7 g tetrabutyl titanate was dropped into the above solution. After ultrasound treatment for 10 min, the homogeneous solution was heated at 150 °C for 24 h in a 50 mL autoclave. Solid product was collected by centrifuging and washing with DMF and methanol. Eventually, the resulting yellow powder was dried at 60 °C overnight to obtain  $NH_2$ -MIL-125(Ti).

*Synthesis of  $O_V$ -TA:*  $NH_2$ -MIL-125(Ti) was thermally annealed at 550 °C for 3 h with a ramp rate of 5 °C  $min^{-1}$  under Ar atmosphere.

*Synthesis of  $O_V$ -TRA:*  $NH_2$ -MIL-125(Ti) was thermally annealed at 800 °C for 3 h with a ramp rate of 5 °C  $min^{-1}$  under Ar atmosphere.

*Synthesis of TRA:*  $O_V$ -TRA was further annealed at 300 °C for 1 h with a ramp rate of 10 °C  $min^{-1}$  under Air atmosphere.

*Synthesis of  $S/O_V$ -TA,  $S/O_V$ -TRA and  $S/TRA$ :*  $O_V$ -TA was mixed with commercial S powder by grinding in a mass ratio of 1:2 and then sealed in a vacuum quartz tube. The quartz tube was

heated at 155 °C for 12 h and then at 300 °C for 20 min to product S/O<sub>V</sub>-TA. S/O<sub>V</sub>-TRA and S/TRA were obtained by the same procedure.

*Synthesis of Na<sub>2</sub>S<sub>6</sub> solution:* A stoichiometric ratio of S and anhydrous Na<sub>2</sub>S powder were added in a mixed solution of PC and FEC with a volume ratio of 1:1. And then the suspension was heated at 80 °C and stirred continuously for 24 h in the argon-filled glove box. Finally, the dark brown solution of Na<sub>2</sub>S<sub>6</sub> (0.2 M) was obtained.

*Na<sub>2</sub>S<sub>6</sub> solution adsorption experiment:* O<sub>V</sub>-TA, O<sub>V</sub>-TRA and TRA powder with the same mass were added into the as-prepared low concentration of Na<sub>2</sub>S<sub>6</sub> solution, respectively. The whole testing process was performed in an argon-filled glove box. Ex-situ ultraviolet-visible (UV-vis) absorption spectra were measured after soaking the samples in the Na<sub>2</sub>S<sub>6</sub> solution for 12 h.

*Na<sub>2</sub>S electrodeposition experiment:* O<sub>V</sub>-TA, O<sub>V</sub>-TRA and TRA hosts were directly used as the current collector for Na<sub>2</sub>S<sub>6</sub> catholyte. 45 μL of Na<sub>2</sub>S<sub>6</sub> was dropped on the hosts in the cathode side and 75 μL of PC/FEC electrolyte without Na<sub>2</sub>S<sub>6</sub> was dropped on the anode. Batteries were first discharged galvanostatically to 1.3 V and afterward kept at a potentiostatical voltage of 1.25 V until the current was below 10<sup>-7</sup>A.

#### *Materials characterization*

The crystal structures of all samples were determined with an X-ray diffractometer (Rigaku Co, Japan, D/MAX-γA) equipped with Cu-Kα radiation. The morphologies of the as-prepared samples were investigated using scanning electron microscopy (SEM, JEOL JSM-6700 M) with a voltage of 200 kV and transmission electron microscopy (TEM, Hitachi H-800) using an accelerating voltage of 200 kV. High resolution transmission electron microscopy (HRTEM, JEOL-2011) was further performed to investigate the structure. The electronic states

of all elements in samples were investigated by X-ray photoelectron spectroscopy (XPS, ESCALAB 250).

#### *Electrochemical measurements*

All the electrochemical measurements were characterized by half coin cells (CR2032). As-synthesized sample, conductive carbon black and carboxymethyl cellulose (CMC) binder were mixed in ultrapure water at a mass ratio of 7:2:1, and as-obtained mixture was magnetically stirred to form a homogeneous slurry. The homogenous slurry was pasted on an Al foil and dried at 80 °C overnight under vacuum to obtain the electrode plate. After the electrode plate was punched into a round sheet with a diameter of 14 mm and used as the working electrode. The electrolyte was a PC and FEC (1:1 by volume) solution containing 2 M Sodium bis(trifluoroMethylsulfonyl) imide (NaTFSI). The galvanostatic charge-discharge tests were measured by the Neware CT3008 W instrument within a voltage window of 0.5-2.8 V. Cyclic voltammetry (CV) and electrochemical impedance spectroscopy (EIS) were performed on CHI760E electrochemical workstation.

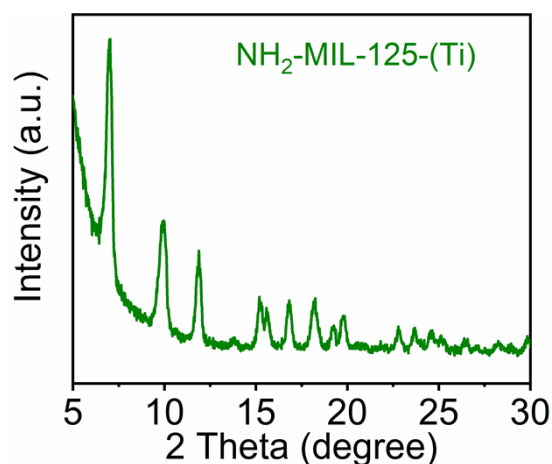

**Figure S1.** The XRD pattern of NH<sub>2</sub>-MIL-125(Ti).

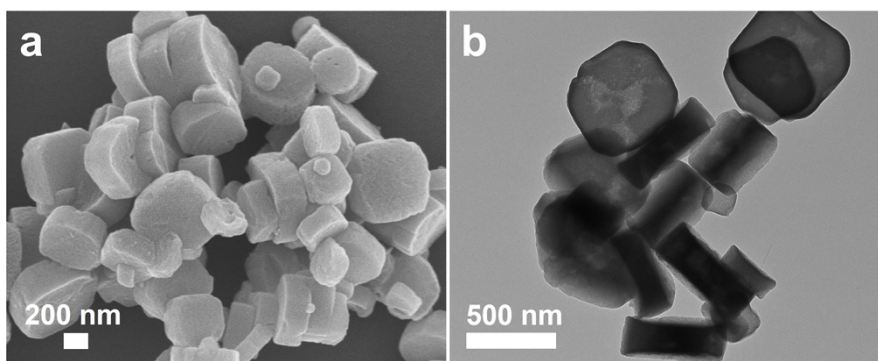

**Figure S2.** (a) SEM and (b) TEM images of O<sub>V</sub>-TA.

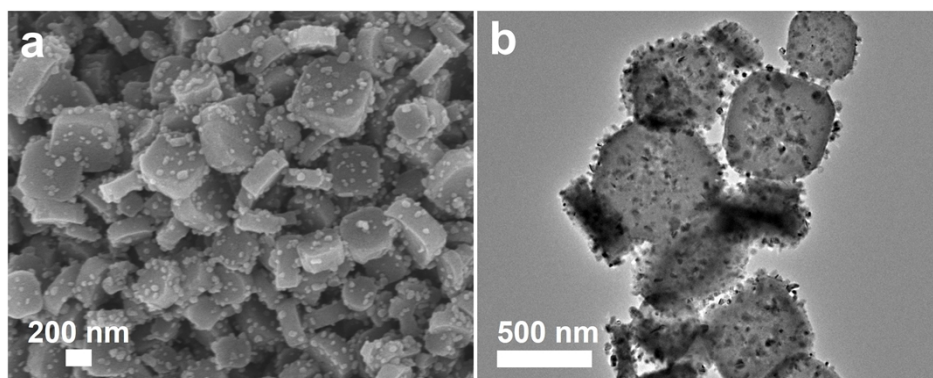

**Figure S3.** (a) SEM and (b) TEM images of TRA.

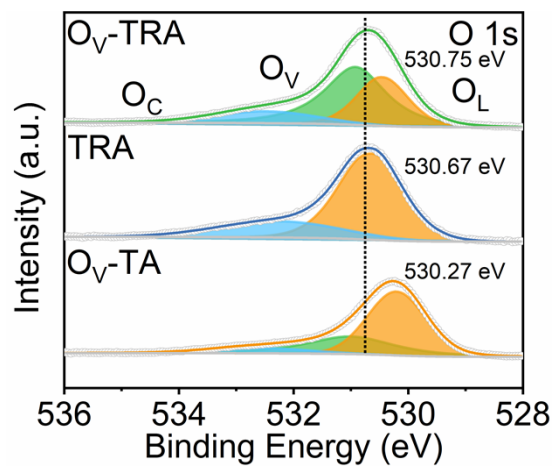

**Figure S4.** O 1s spectra of O<sub>V</sub>-TRA, O<sub>V</sub>-TA and TRA.

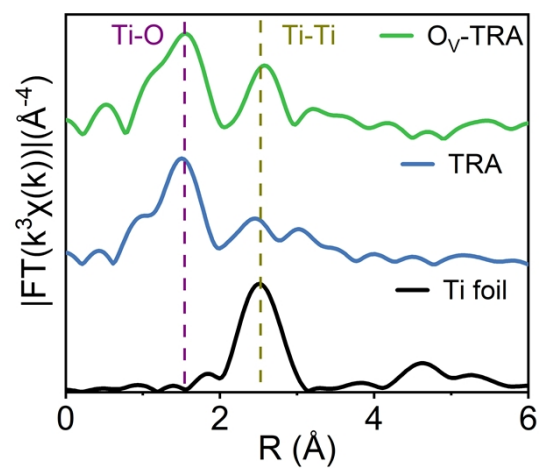

**Figure S5.** The  $k^3$ -weighted Fourier transform of EXAFS spectra of  $\text{O}_V\text{-TRA}$ , TRA and Ti foil.



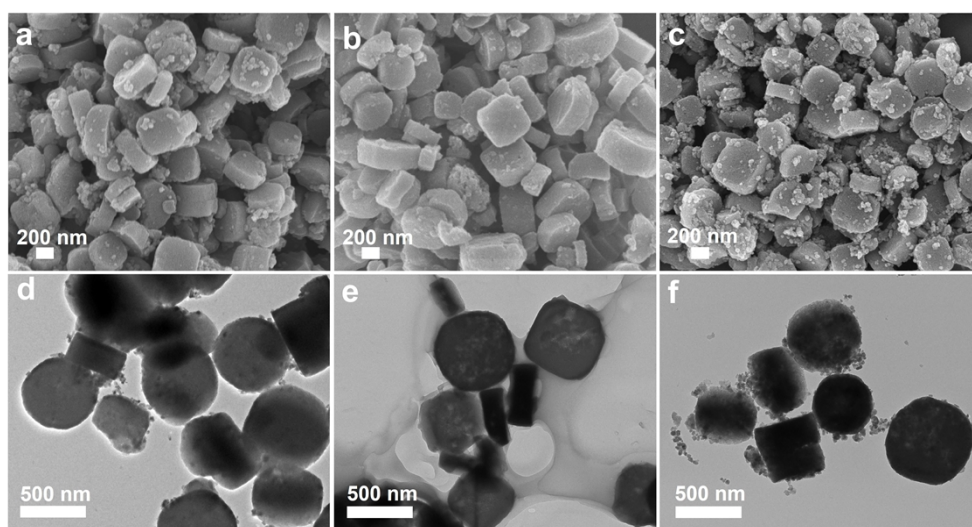

**Figure S6.** The SEM images of (a) S/O<sub>V</sub>-TRA, (b) S/O<sub>V</sub>-TA and (c) S/TRA. The TEM images of (d) S/O<sub>V</sub>-TRA, (e) S/O<sub>V</sub>-TA and (f) S/TRA.

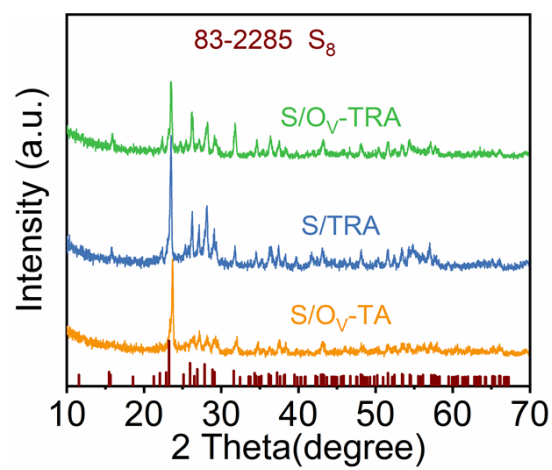

**Figure S7.** The XRD patterns of S/O<sub>V</sub>-TRA, S/O<sub>V</sub>-TA and S/TRA.

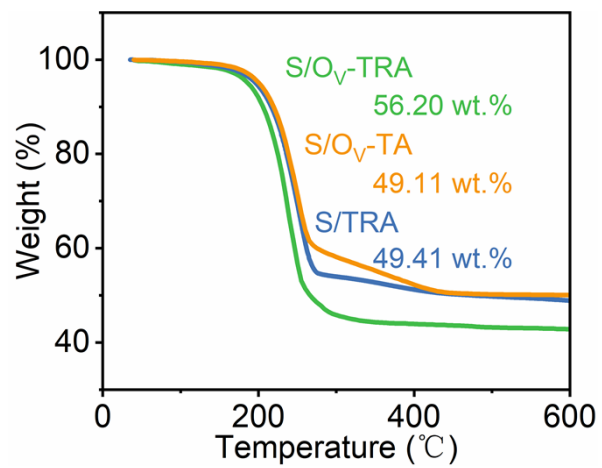

**Figure S8.** TGA curves of S/O<sub>V</sub>-TRA, S/O<sub>V</sub>-TA and S/TRA.

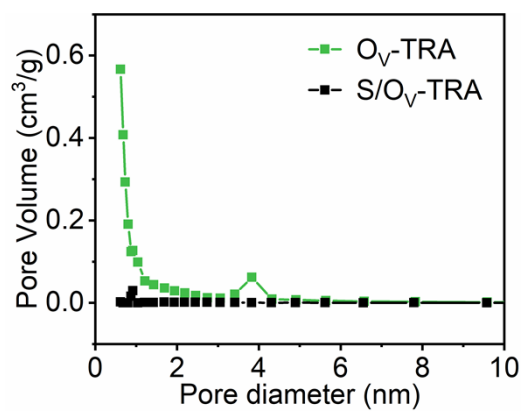

**Figure S9.** Pore size distributions of O<sub>V</sub>-TRA and S/O<sub>V</sub>-TRA.

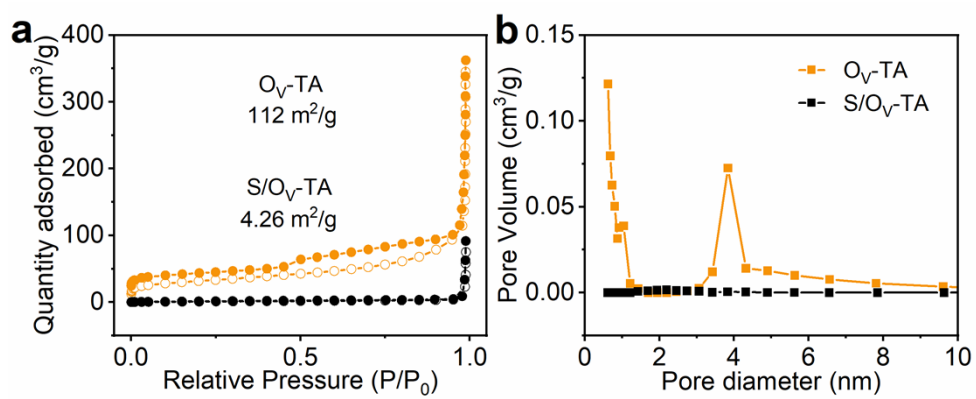

**Figure S10.** (a)  $N_2$  adsorption-desorption isotherms and (b) pore size distributions of  $O_V-TA$  and  $S/O_V-TA$ .

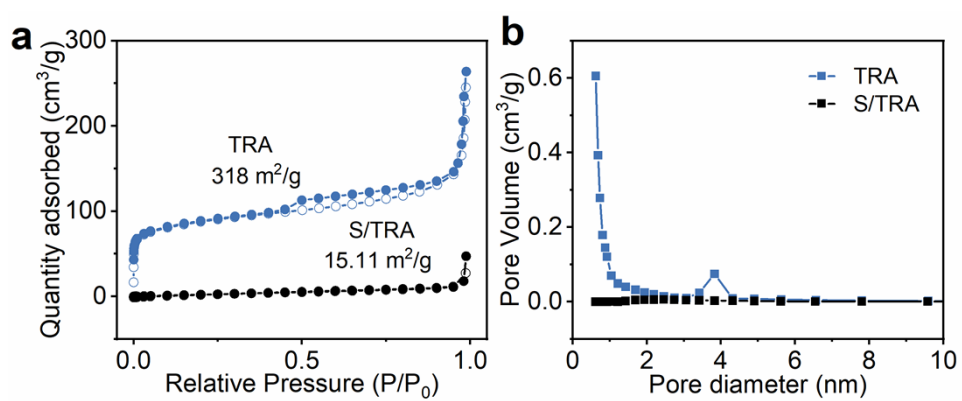

**Figure S11.** (a) N<sub>2</sub> adsorption-desorption isotherms and (b) pore size distributions of TRA and S/TRA.

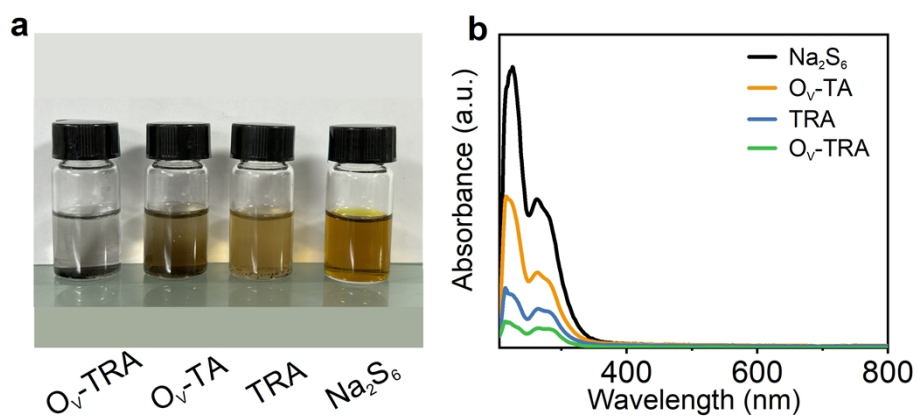

**Figure S12.** (a) Digital images of O<sub>V</sub>-TRA, O<sub>V</sub>-TA, and TRA immersed into Na<sub>2</sub>S<sub>6</sub>-DME. (b) UV-vis spectra of O<sub>V</sub>-TRA, O<sub>V</sub>-TA, and TRA, after interacting with Na<sub>2</sub>S<sub>6</sub> solution (Na<sub>2</sub>S<sub>6</sub> in DME).

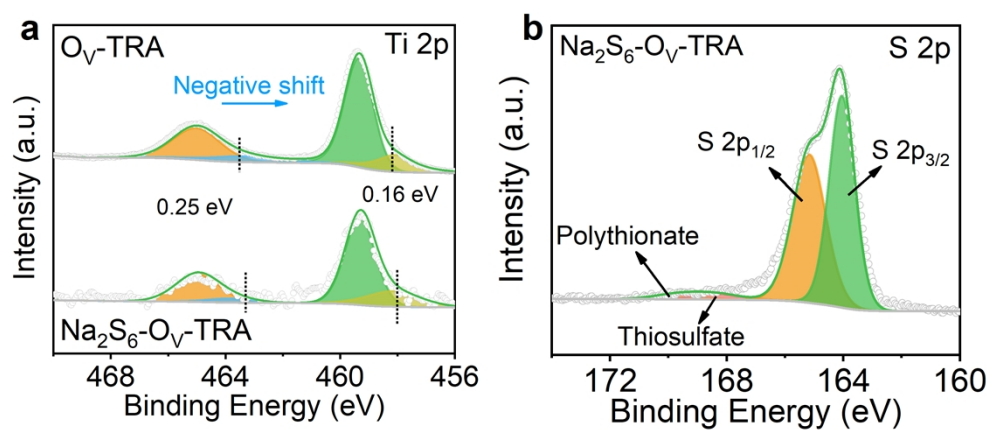

**Figure S13.** (a) Ti 2p and (b) S 2p of  $O_V$ -TRA, after interacting with  $Na_2S_6$  solution ( $Na_2S_6$  in DME).



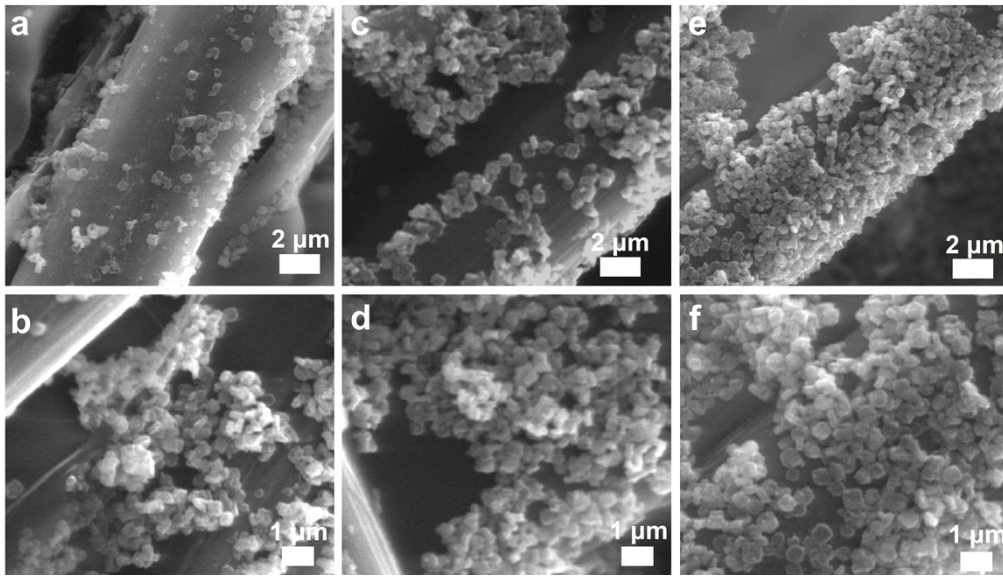

**Figure S14.** After carried out the constant potential nucleation and growth experiments, the enlarged SEM images of (a-b) O<sub>V</sub>-TRA, (c-d) TRA and (e-f) O<sub>V</sub>-TA.

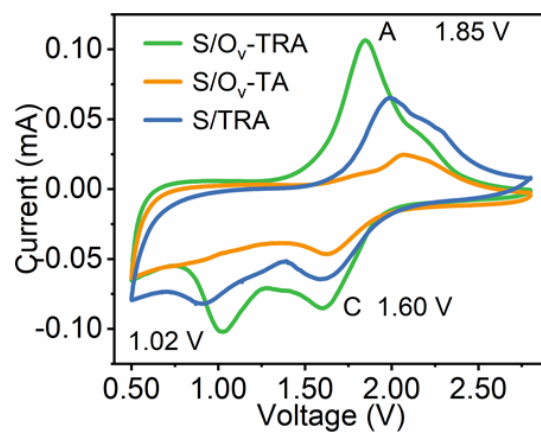

**Figure S15.** CV curves of S/O<sub>v</sub>-TRA, S/O<sub>v</sub>-TA and S/TRA electrodes at a scan rate of 0.1 mV s<sup>-1</sup>.

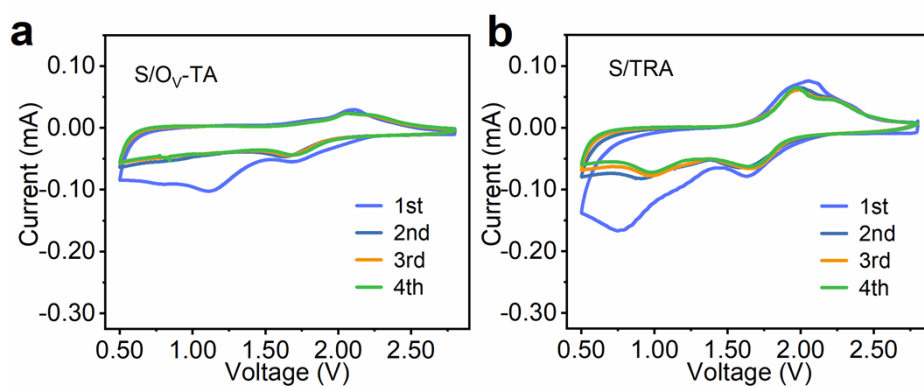

**Figure S16.** CV curves of the first four turns of (a) S/O<sub>v</sub>-TA, and (b) S/TRA for a scan rate of 0.1 mV s<sup>-1</sup>.

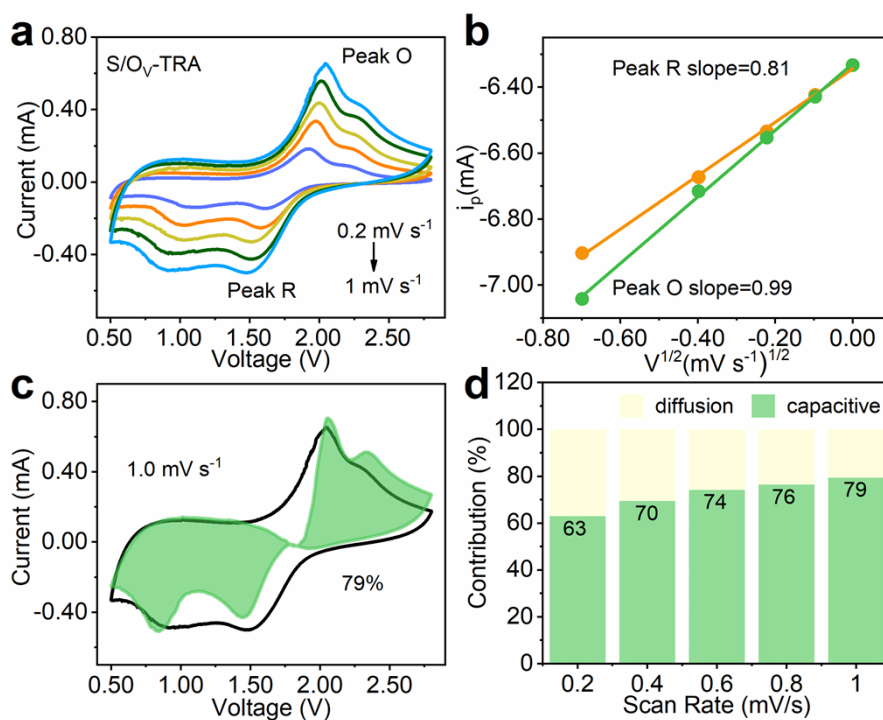

**Figure S17.** (a) CV curves at different scan rates of S/O<sub>V</sub>-TRA. (b) Relationship between peak current and scan rates of S/O<sub>V</sub>-TRA, corresponding log (i) vs. log (v) plots based on the two peaks. (c) CV curve of S/O<sub>V</sub>-TRA at 1 mV s<sup>-1</sup> and the corresponding pseudocapacitive contribution. (d) The corresponding contribution ratio of the capacitive capacity at various scan rates.

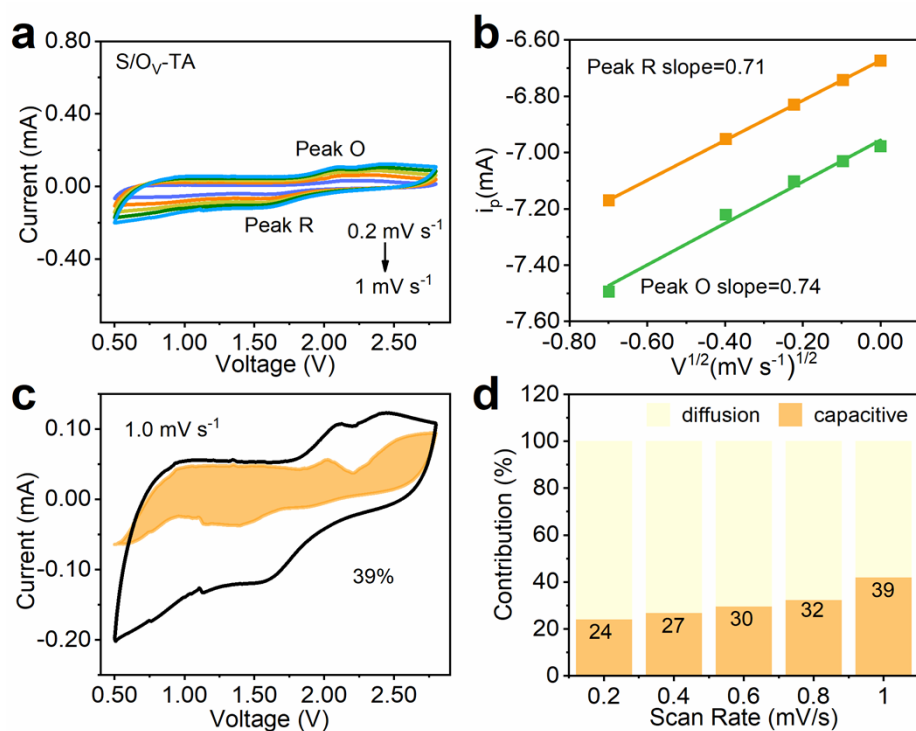

**Figure S18.** (a) CV curves at different scan rates of S/O<sub>V</sub>-TA. (b) Relationship between peak current and scan rates of S/O<sub>V</sub>-TA, corresponding log (i) vs. log (v) plots based on the two peaks. (c) CV curve of S/O<sub>V</sub>-TA at 1 mV s<sup>-1</sup> and the corresponding pseudocapacitive contribution. (d) The corresponding contribution ratio of the capacitive capacity at various scan rates.

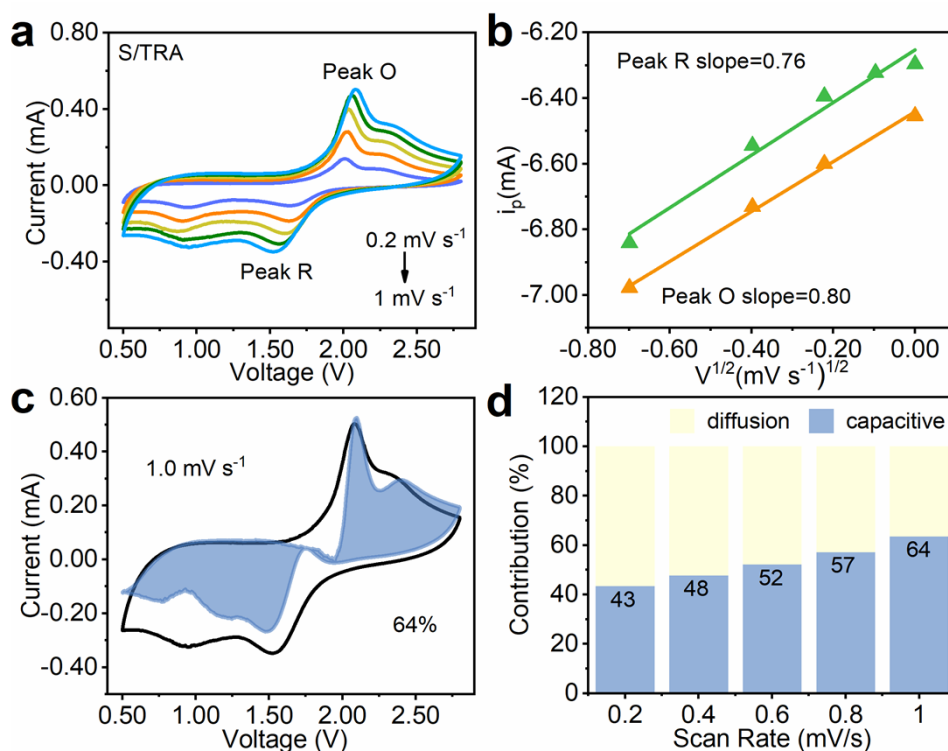

**Figure S19.** (a) CV curves at different scan rates of S/TRA. (b) Relationship between peak current and scan rates of S/TRA, corresponding log ( $i$ ) vs. log ( $v$ ) plots based on the two peaks. (c) CV curve of S/TRA at 1 mV s<sup>-1</sup> and the corresponding pseudocapacitive contribution. (d) The corresponding contribution ratio of the capacitive capacity at various scan rates.

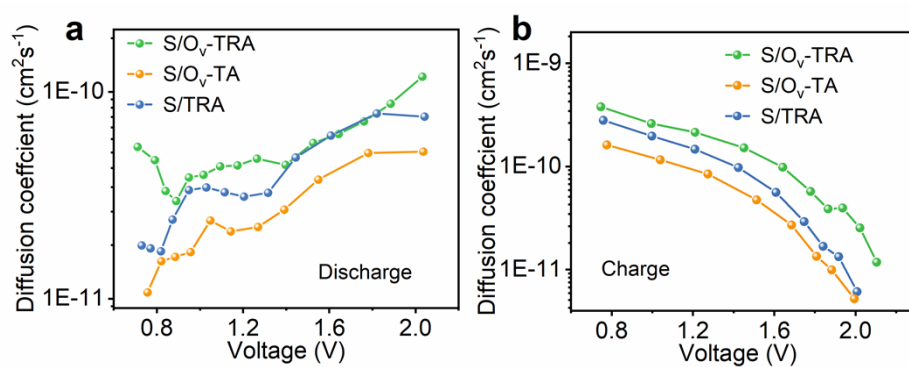

**Figure S20.** (a) Diffusion coefficients of Na<sup>+</sup> in S/O<sub>V</sub>-TRA, S/O<sub>V</sub>-TA and S/TRA during the sodiation process. (b) Diffusion coefficients of Na<sup>+</sup> in S/O<sub>V</sub>-TRA, S/O<sub>V</sub>-TA and S/TRA during the desodiation process.

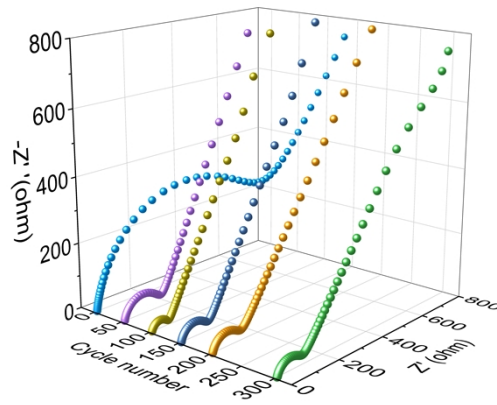

**Figure S21.** Nyquist plots of S/O<sub>V</sub>-TRA after different cycles from the 0 to 300th cycles.



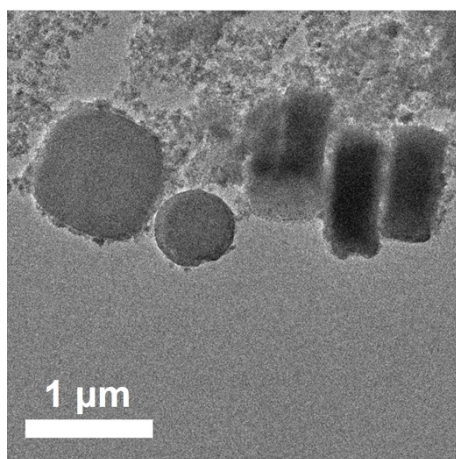

**Figure S22.** TEM image of S/O<sub>V</sub>-TRA after cycling.

**Table S1.** Summary of BET surface area and Pore volume of O<sub>V</sub>-TRA, O<sub>V</sub>-TA and TRA.

| <b>Sample</b>       | <b>Specific surface<br/>area (m<sup>2</sup> g<sup>-1</sup>)</b> | <b>Pore volume (m<sup>3</sup> g<sup>-1</sup>)</b> |
|---------------------|-----------------------------------------------------------------|---------------------------------------------------|
| O <sub>V</sub> -TRA | 350                                                             | 0.419                                             |
| O <sub>V</sub> -TA  | 112                                                             | 0.418                                             |
| TRA                 | 318                                                             | 0.409                                             |

**Table S2.** Summary of BET surface area and Pore volume of S/O<sub>V</sub>-TRA, S/O<sub>V</sub>-TA and S/TRA.

| <b>Sample</b>         | <b>Specific surface area (m<sup>2</sup> g<sup>-1</sup>)</b> | <b>Pore volume (m<sup>3</sup> g<sup>-1</sup>)</b> |
|-----------------------|-------------------------------------------------------------|---------------------------------------------------|
| S/O <sub>V</sub> -TRA | 3.92                                                        | 0.066                                             |
| S/O <sub>V</sub> -TA  | 4.26                                                        | 0.392                                             |
| S/TRA                 | 15.11                                                       | 0.073                                             |

**Table S3.** Performance comparisons of S/O<sub>V</sub>-TRA with previously reported S cathodes in RT Na-S batteries.

| Cathode                                    | Rate (C) | Cycle number | Capacity (mAh g <sup>-1</sup> ) | Ref.       |
|--------------------------------------------|----------|--------------|---------------------------------|------------|
| S/O <sub>V</sub> -TRA                      | 1        | 1000         | 759                             | This work. |
| S@CNT/NPC                                  | 0.5      | 500          | 410                             | Ref. 1     |
| S/TiO <sub>2</sub> @MCCFs                  | 1.2      | 500          | 300.5                           | Ref. 2     |
| MG-Co@S                                    | 0.5      | 200          | 360                             | Ref. 3     |
| DPC/S                                      | 0.5      | 600          | 320                             | Ref. 4     |
| Hybrid MXenes                              | 1        | 500          | 357                             | Ref. 5     |
| S/MnO@NACM                                 | 1.2      | 1000         | 234                             | Ref. 6     |
| Co@NPCNFs/S                                | 1        | 800          | 411                             | Ref. 7     |
| SC                                         | 0.6      | 800          | 330                             | Ref. 8     |
| Se <sub>0.05</sub> S <sub>0.95</sub> @pPAN | 1        | 50           | 372                             | Ref. 9     |

## References

- [1] T. Yang, W. Gao, B. Guo, R. Zhan, Q. Xu, H. He, S.-J. Bao, X. Li, Y. Chen, M. Xu, *J. Mater. Chem. A* **2019**, *7*, 150.
- [2] X. Ye, Z. Li, H. Sun, M. Wu, Z. An, Y. Pang, J. Yang, S. Zheng, *New Carbon Mater.* **2022**, *37*, 1116.
- [3] Q. Yang, T. Yang, W. Gao, Y. Qi, B. Guo, W. Zhong, J. Jiang, M. Xu, *Inorg. Chem. Front.* **2020**, *7*, 4396.
- [4] Y. Liu, X. Li, Y. Sun, R. Yang, Y. Lee, J.-H. Ahn, *Ionics* **2021**, *27*, 199.

- [5] Z. Huang, S. Wang, X. Guo, J. Safaei, Y. Lei, W. Lai, X. Zhang, B. Sun, D. Shanmukaraj, M. Armand, T. Rojo, G. Wang, *Adv. Mater. Technol.* **2023**, *8*, 2202147.
- [6] X. L. Huang, P. Xiang, H. Liu, C. Feng, S. Zhang, Z. Tian, H. K. Liu, S. X. Dou, Z. Wang, *Inorg. Chem. Front.* **2022**, *9*, 5486.
- [7] W. Du, W. Gao, T. Yang, B. Guo, L. Zhang, S. Bao, Y. Chen, M. Xu, *J. Colloid Interface Sci.* **2020**, *565*, 63.
- [8] K. Chen, H. Li, Y. Xu, K. Liu, H. Li, X. Xu, X. Qiu, M. Liu, *Nanoscale* **2019**, *11*, 5967.
- [9] T. An, H. Jia, L. Peng, J. Xie, *ACS Appl. Mater. Interfaces* **2020**, *12*, 20563.
